# Supplementary material for: TRPV6 modulates proliferation of human pancreatic neuroendocrine BON-1 tumour cells
Source: Oxford University Press journal article supplement (doi:10.1042/bsr20160106), 2016-07-23
Supplement: bsr036e372add.pdf [file bsr036e372add.pdf]

**Supp. Table 1. Primer sequences and sizes of real-time PCR products**

| Gene          | Primer                       |                                | Product size (bp) |
|---------------|------------------------------|--------------------------------|-------------------|
|               | Forward                      | Reverse                        |                   |
| <i>CCND1</i>  | <i>CCATCCAGTGGAGGTTTGTC</i>  | <i>GTGGGACAGGTGGCCTTT</i>      | 66                |
| <i>CCND2</i>  | <i>GGGCCATAACCAAACTCAC</i>   | <i>TTCTGGATCCCACCCTTG</i>      | 61                |
| <i>CDK4</i>   | <i>CCTCTCCTTTTGAGGCTTCTC</i> | <i>GGAAAGGGACAAGAGGGAAC</i>    | 75                |
| <i>TRPV6</i>  | <i>AGAGCCGAGATGAGCAGAAC</i>  | <i>GAAGGAGAGGAGACTCCCAGA</i>   | 60                |
| <i>NFATc1</i> | <i>CCAAGGTCATTTTCGTGGAG</i>  | <i>GGTCAGTTTTCGCTTCCATC</i>    | 69                |
| <i>NFATc2</i> | <i>CATCTAACCCCATCGAGTGC</i>  | <i>GCTGTCTGTGTCTTGTCTTTCAA</i> | 74                |
| <i>NFATc3</i> | <i>ACTCGTCTTTGGCGAGGA</i>    | <i>TCATCTGGCTCAAGATCTGC</i>    | 75                |
| <i>NFATc4</i> | <i>CAGTCCAGGTCTTCCTTCCTC</i> | <i>CGAACACCAGCTTAAATTCCA</i>   | 113               |
| <i>GAPDH</i>  | <i>CGCTCTCTGCTCCTCCTGTT</i>  | <i>CCATGGTGTCTGAGCGATGT</i>    | 173               |
